# Supplementary material for: Transcriptome analysis reveals different responses and tolerance mechanisms of EPSPS and GAT genes in transgenic soybeans
Source: Research Square preprint supplement (doi:10.21203/rs.3.rs-176579/v1), 2021-05-26
Supplement: Supplementary file 1 [file 384bdb0664f1082e8d665557.xlsx]

## Sheet: Sheet1
Additional File 1. Sequences of paired primers used for qRT-PCR
Genes	Primers	Sequences (5'-3')	Fragment size
Actin	ACT-RT1	CGGTGGTTCTATCTTGGCATC	142bp
	ACT-RT2	GTCTTTCGCTTCAATAACCCTA
Glyma.08G334500	TV1RT-1	AACGCCTCGAGAATGATCCC	127bp
	TV1RT-2	CCCGTCGTATGGTGGTGTTT
Glyma.20G205800	TV2RT-1	ATGGCCTGAGTTGGTTGGAG	169bp
	TV2RT-2	CCCAAACCCGAACCCTATCA
Glyma.14G081300	TV3RT-1	GGAGAAGCTTTGCCACGTTG	174bp
	TV3RT-2	TGTGGGGATCTCATTTCACGG
Glyma.11G170300	TV4RT-1	GGTCTAGAAGCCAGAGTGCC	125bp
	TV4RT-2	GCCCTCCTCAGTACCCATTT
Glyma.10G221500	TV5RT-1	TCCCATGAGTTGCGGAATGG	166bp
	TV5RT-2	CAGAAACATGGGCAGCAACC
Glyma.16G164800	TV6RT-1	TGTGTCTCCAGCACCATTCC	158bp
	TV6RT-2	GCTGGCTACTGGTATCCGAC
Glyma.03G261800	TV7RT-1	CCTCCTTTCGCACAGGATGA	170bp
	TV7RT-2	CACACGGGAGAATCTGCAGA
Glyma.05G195900	TV8RT-1	TCCTATCCAAGCCAGCTCCT	118bp
	TV8RT-2	TTGTCACACCGGATTCTGGG
Glyma.04G255400	TV9RT-1	CTCCGACAAGCTTTCCGTCT	135bp
	TV9RT-2	GGACACCTTGACTTCACCCC
Glyma.01G142400	TV10RT-1	AAATACGAACCCACCGCACT	179bp
	TV10RT-2	TCGTAGCTGACATCGATGCC
Glyma.19G014600	TV11RT-1	CGTCTCGCCCTAAACTCGTT	154bp
	TV11RT-2	CGAATGTGGCTCCGTTGTTC
Glyma.17G017400	TV12RT-1	AATTCCTTCCTCGACGCGTT	105bp
	TV12RT-2	AGAGGAATGAAGGACGGGGA
Glyma.03G237300	TV13RT-1	GGACTTGTGATGTGGAGCCA	131bp
	TV13RT-2	TGGCATGTTAACCGGTCCAA
Glyma.13G119000	TV14RT-1	CCTGGTGAGTCAAGAGCCTG	178bp
	TV14RT-2	TTGAACTCCTCGCTCCCCTA
Glyma.18G265800	TV15RT-1	ACTTCGCTGGCCTCTTTTGA	127bp
	TV15RT-2	CCGTGTCCATCATAGGCGAA
